# Supplementary material for: C–C (alkynylation) vs C–O (ether) bond formation under Pd/C–Cu catalysis: synthesis and pharmacological evaluation of 4-alkynylthieno[2,3-d]pyrimidines
Source: publisher site journal article supplement (doi:10.3762/bjoc.7.44), 2011-03-21

## Supporting Information

for

### **C–C (alkynylation) vs C–O (ether) bond formation under Pd/C–Cu catalysis: synthesis and pharmacological evaluation of 4-alkynylthieno[2,3-*d*]pyrimidines**

Dhilli Rao Gorja<sup>1,2</sup>, K. Shiva Kumar<sup>1</sup>, K. Mukkanti<sup>2</sup>, Manojit Pal\*<sup>1</sup>

Address: <sup>1</sup>Institute of Life Sciences, University of Hyderabad Campus, Gachibowli, Hyderabad-500 046, India and <sup>2</sup>Chemistry Division, Institute of Science and Technology, JNT University, Kukatpally, Hyderabad 500072, India.

E-mail: Manojit Pal\* - [manojitpal@rediffmail.com](mailto:manojitpal@rediffmail.com)

\*Corresponding author

### **NMR spectra of compounds 3a–n**

3a <sup>1</sup>H NMR (400 MHz, CDCl<sub>3</sub>)

118-828-02-01 in CDCl<sub>3</sub>  
NCS

AR.No:MS0210/698  
Analyst:Srikanth.A  
Date:04h Feb. 2010

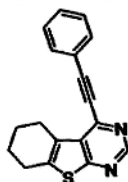

MSD, Amgen Discovery Technologies Ltd, Hyderabad  
Instrument Mercury 400 (Varian 400MHz)  
Date & Time Sat Feb 6 11:13:40 IST 2010  
Recorded By Srikanth.A

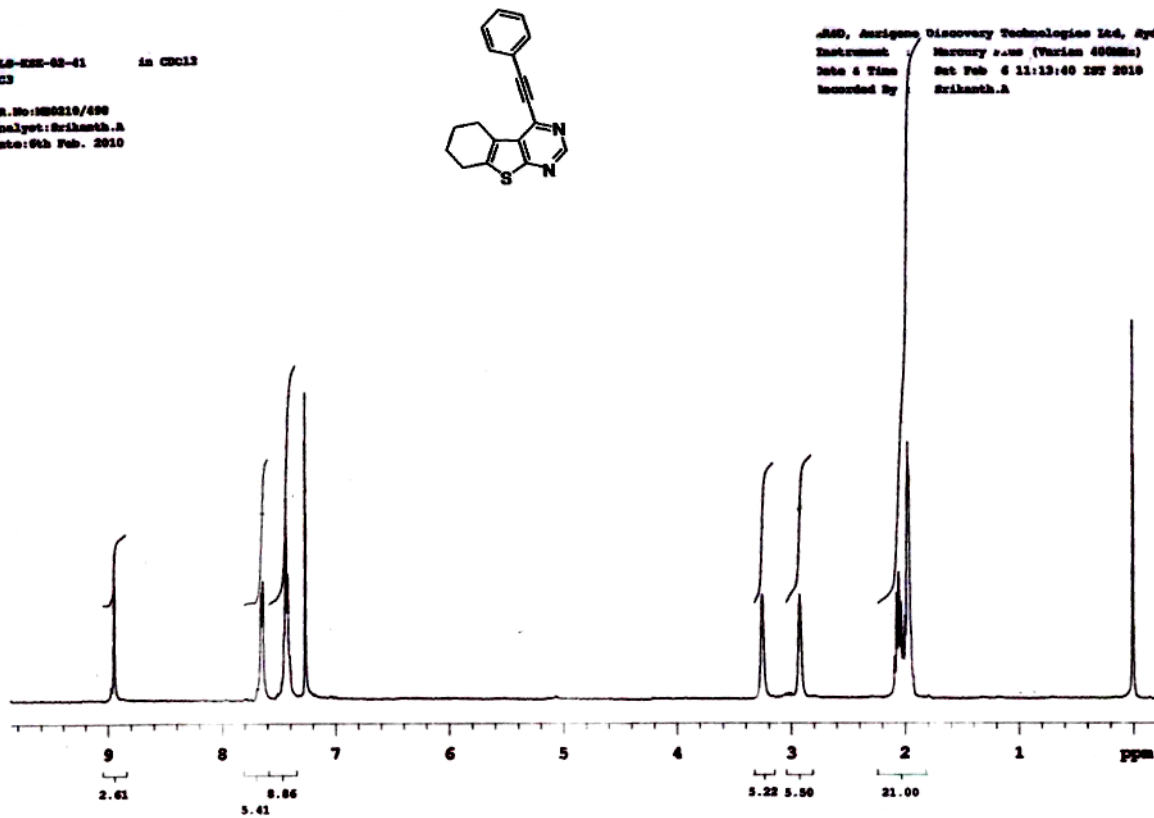

3a <sup>13</sup>C NMR (100 MHz, CDCl<sub>3</sub>)

ILS-RSK-02-#41 in CDCl<sub>3</sub>  
ILS-MC3

MR. NO: 020310/101  
Analyst: Srikanth.A  
Date: 26th March 2010

ARL0, Arisone Discovery Technologies Ltd, Hyderabad  
Instrument : Mercury Plus (Varian 400MHz)  
Date & Time : Tue Mar 30 11:09:44 IST 2010  
Recorded By : Shruthi. D

*S. Srikanth*

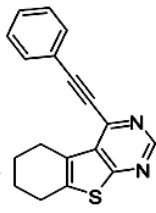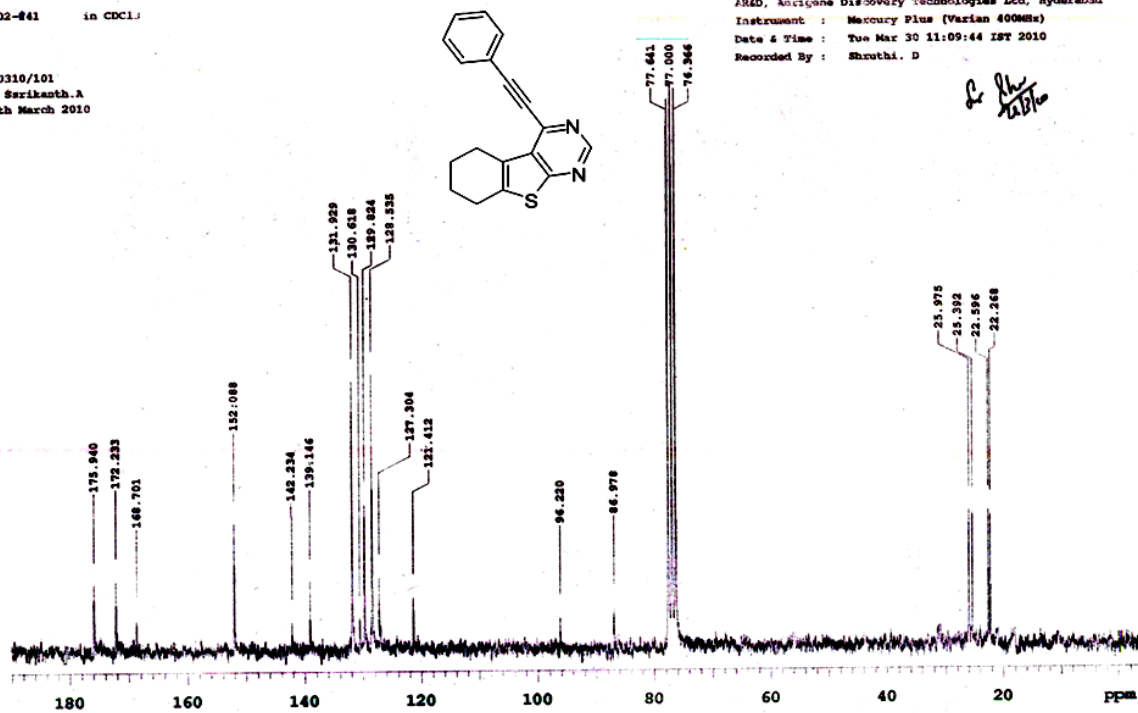

**3b**  $^1\text{H}$  NMR (400 MHz,  $\text{CDCl}_3$ )

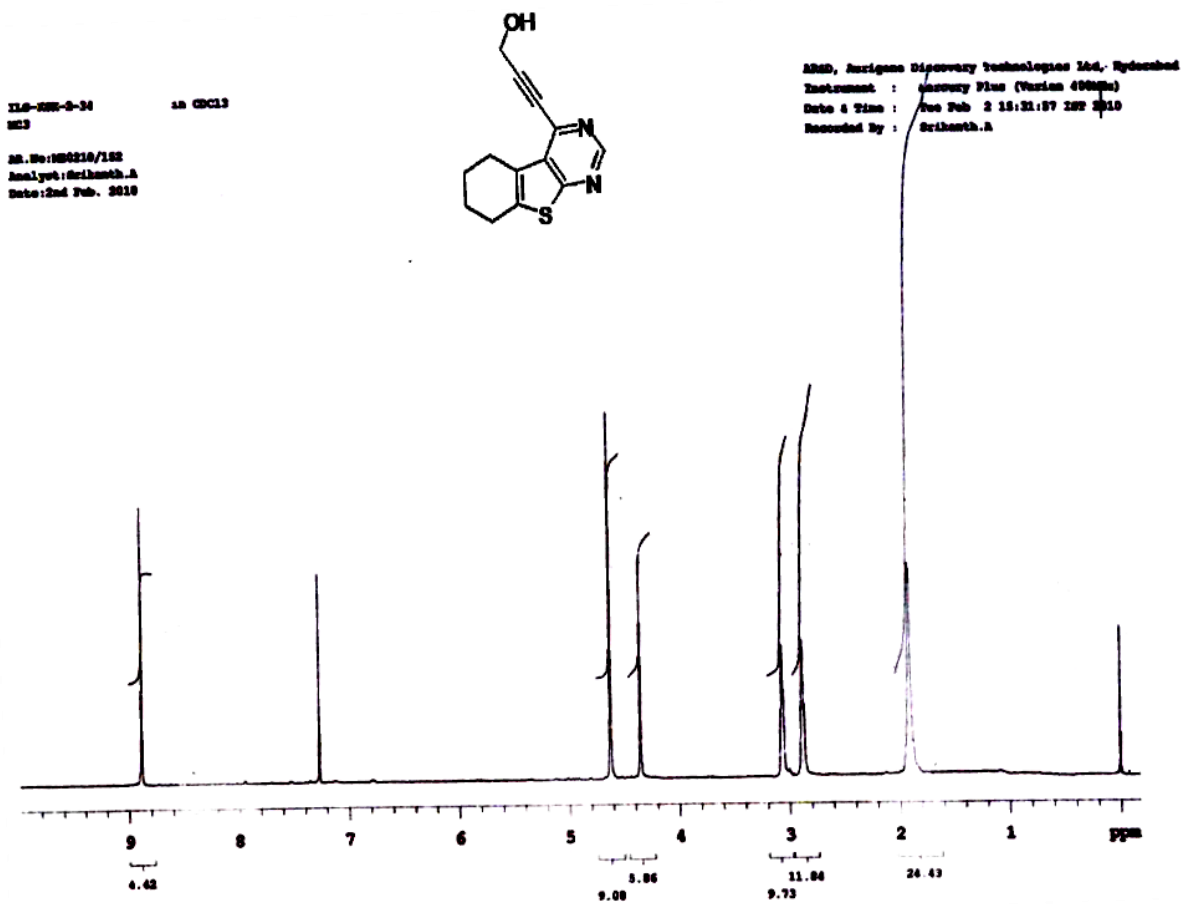

**3b**  $^{13}\text{C}$  NMR (100 MHz,  $\text{CDCl}_3$ )

ILS-KSK-02-34 in  $\text{CDCl}_3$   
MCS

AN.WO:G80210/33  
Analyst: Srikanth.A  
Date: 10th March 2010

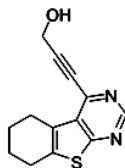

AR&D, Aurigene Discovery Technologies Ltd, Hyderabad  
Instrument : Mercury Plus (Varian 400MHz)  
Date & Time : Fri Mar 12 09:25:11 IST 2010  
Recorded By : Shruthi. D

*Handwritten signature*  
10/3/10

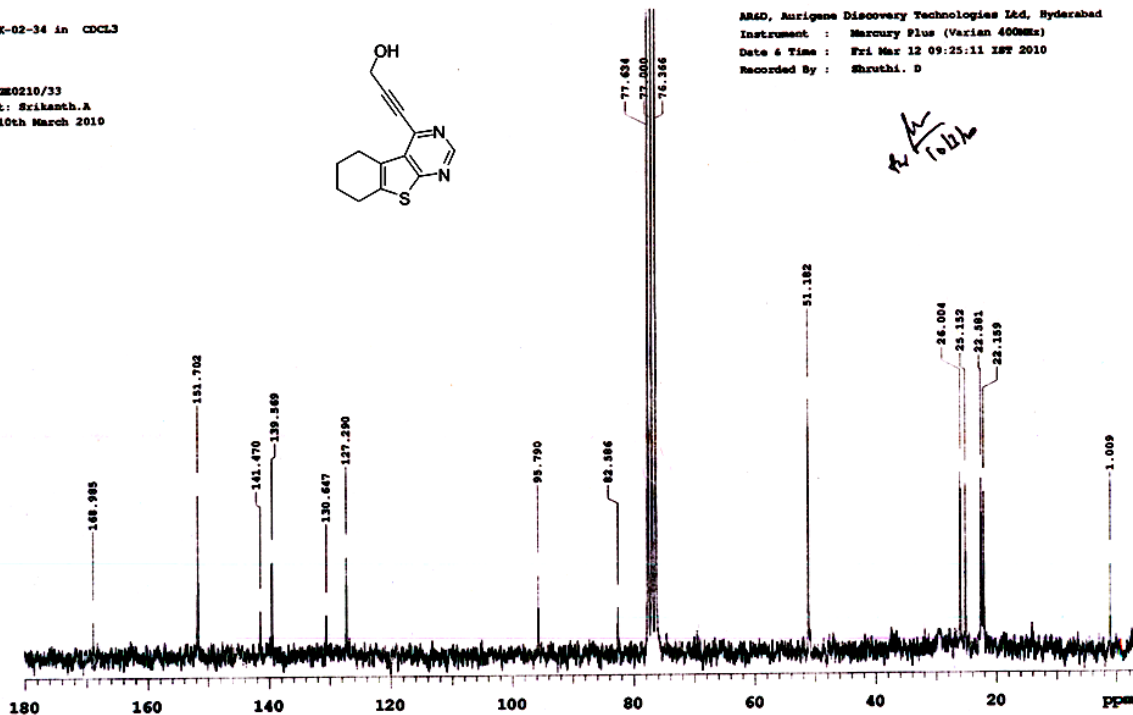

3c <sup>1</sup>H NMR (400 MHz, CDCl<sub>3</sub>)

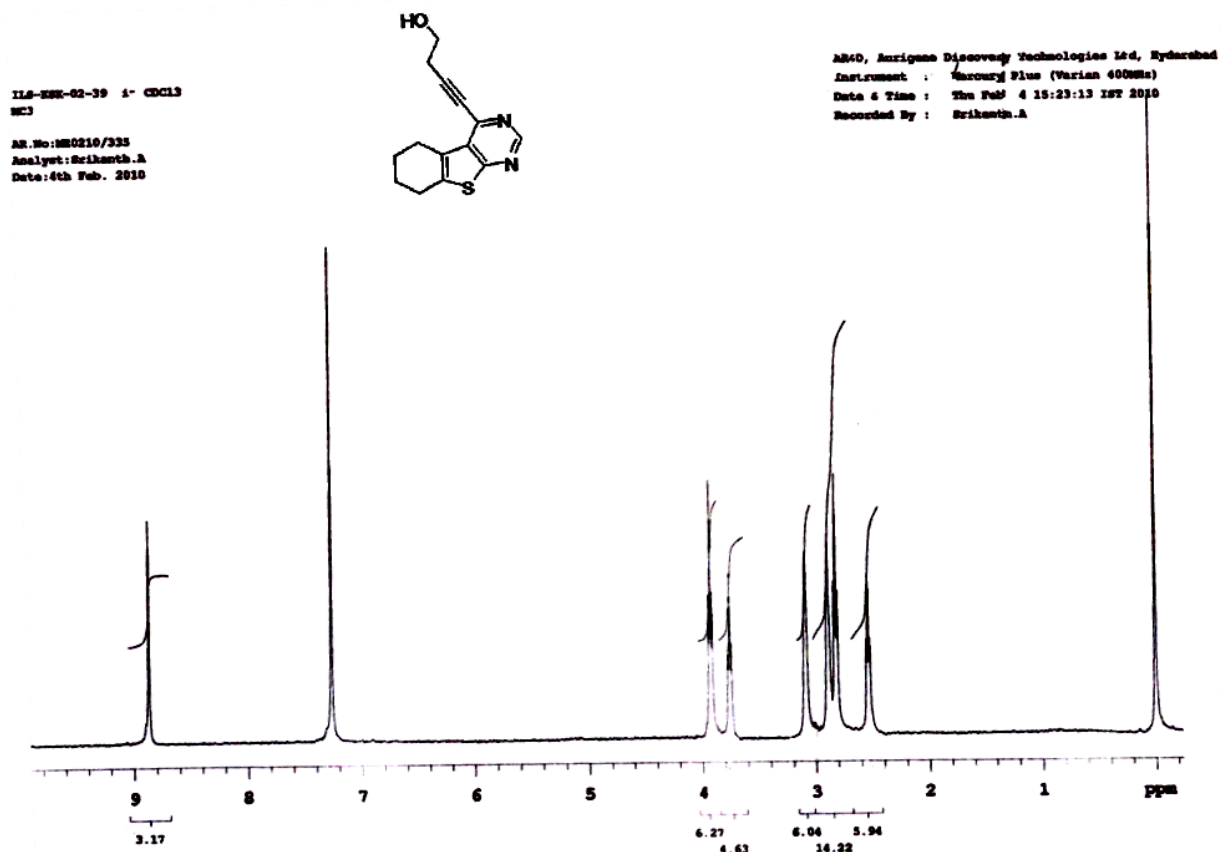

3c <sup>13</sup>C NMR (100 MHz, CDCl<sub>3</sub>)

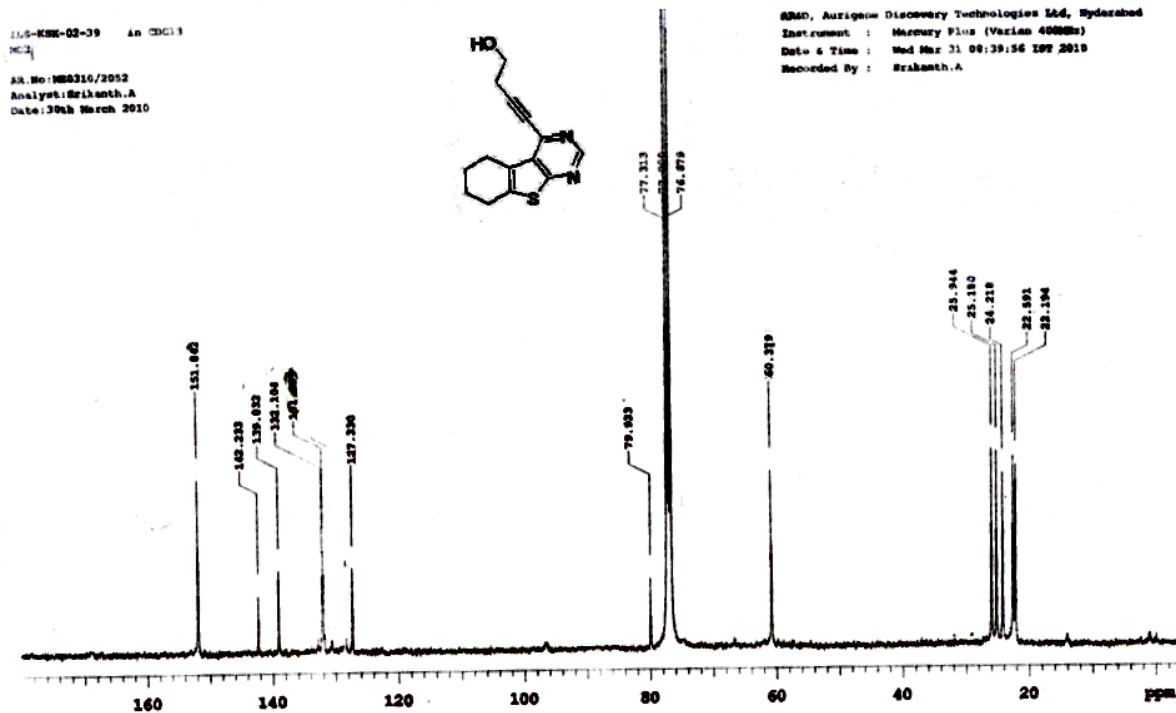

3d <sup>1</sup>H NMR (400 MHz, CDCl<sub>3</sub>)

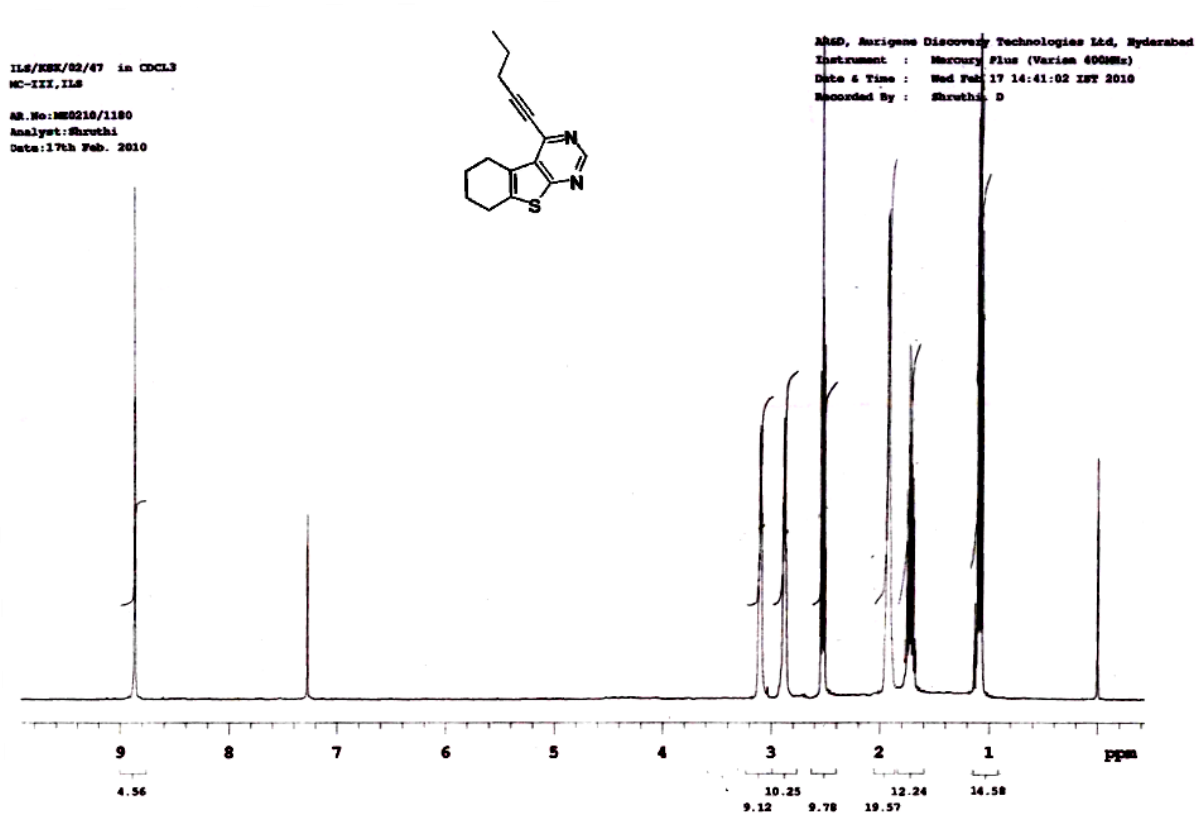



3d <sup>13</sup>C NMR (100 MHz, CDCl<sub>3</sub>)

ILS-KSK-02-47 in CDCl<sub>3</sub>  
ILS, MC3

AN.NO: GE0310/90  
Analyst: Srikanth.A  
Date: 24th March 2010

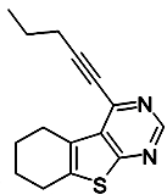

ARSD, Arvigene Discovery Technologies Ltd, Hyderabad  
Instrument : Mercury Plus (Varian 400MHz)  
Date & Time : Thu Mar 25 09:13:17 IST 2010  
Recorded By : Shruthi. D

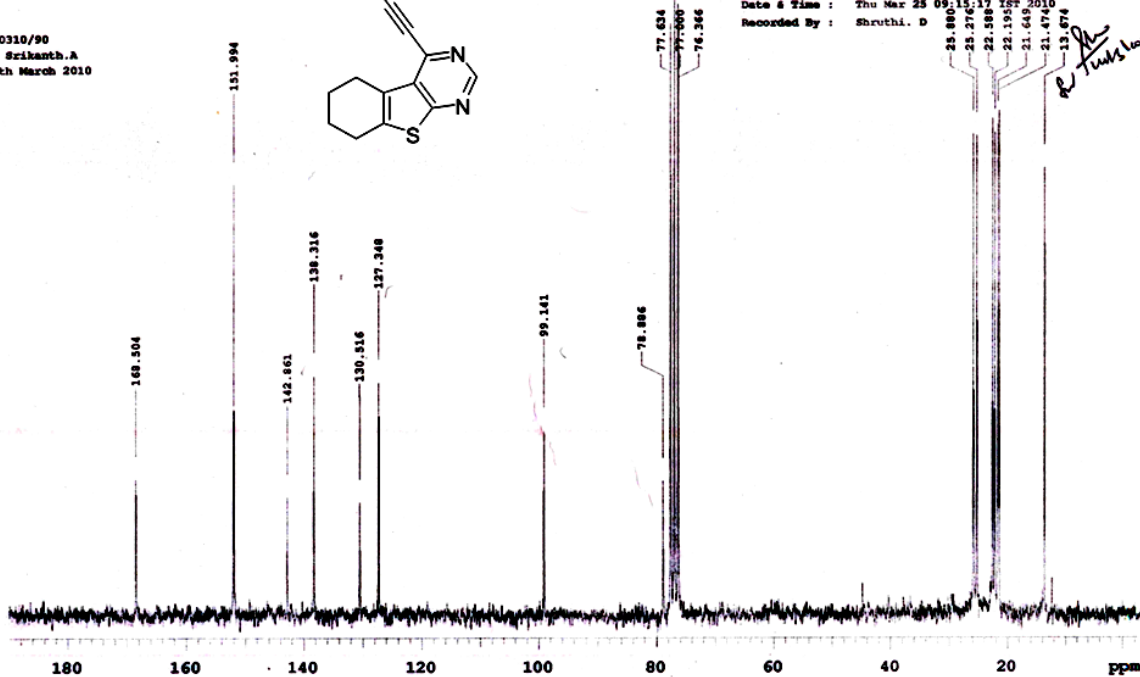

3e <sup>1</sup>H NMR (400 MHz, CDCl<sub>3</sub>)

ILS-MSK-03-134  
File No: 20101112\_5  
Sample Name:  
Data Collected on:  
vornhole-vmsr48C  
Archive directory:  
Sample directory:  
File: PROTON  
Pulse Sequence: PROTON (s2pul)  
Solvent: cdcl3  
Data collected on: Nov 12 2010

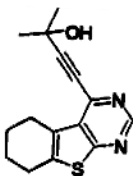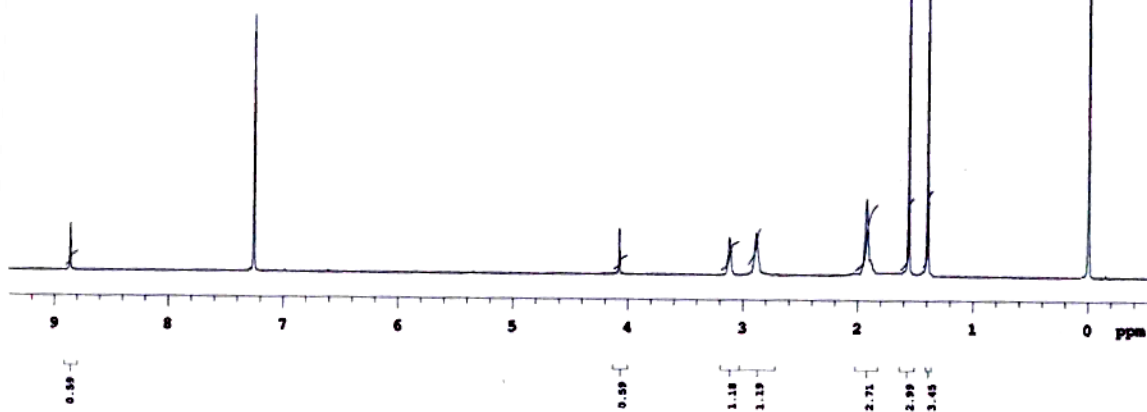



3f  $^1\text{H}$  NMR (400 MHz,  $\text{CDCl}_3$ )

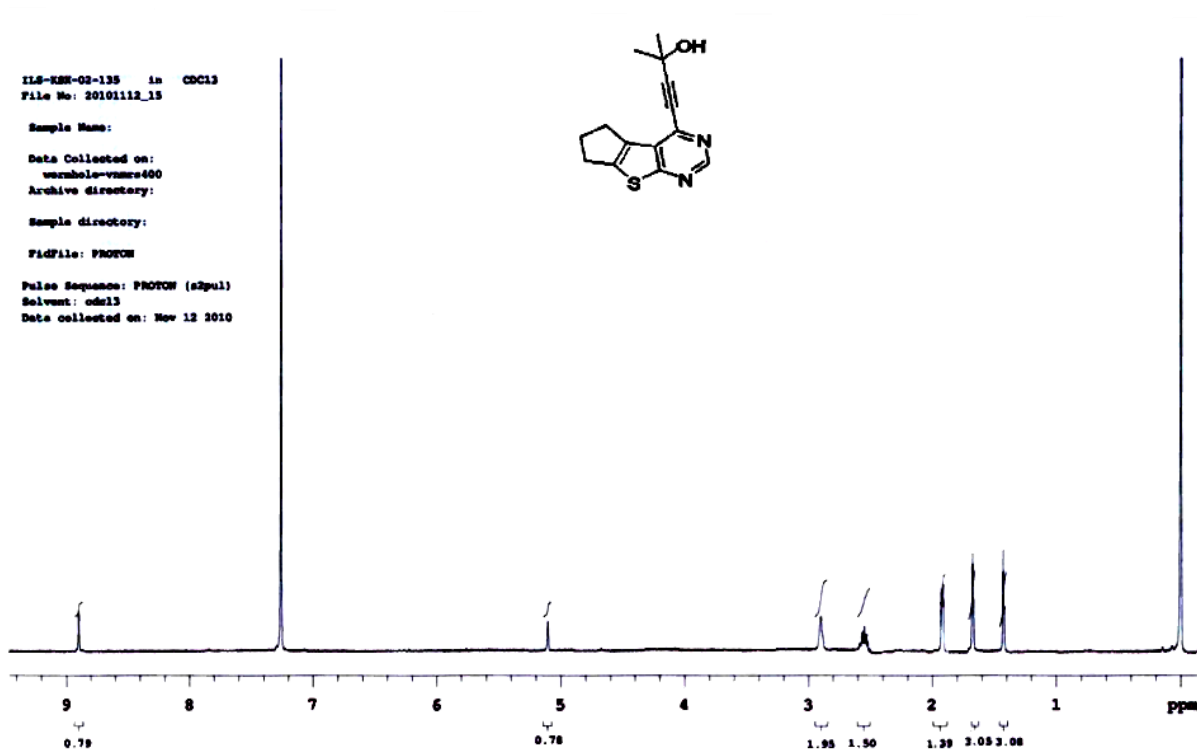

3f <sup>13</sup>C NMR (100 MHz, CDCl<sub>3</sub>)

ILS-KSK-02-135 in CDCl<sub>3</sub>  
13C Exp.  
File No:20101112\_18  
Sample Name:  
Data Collected on:  
wornhole-vmrs400  
Archive directory:  
Sample directory:  
Fid#file: CARBON  
Pulse Sequence: CARBON (s2pul)  
Solvent: cdcl3  
Data collected on: Nov 12 2010

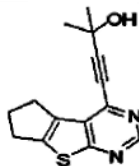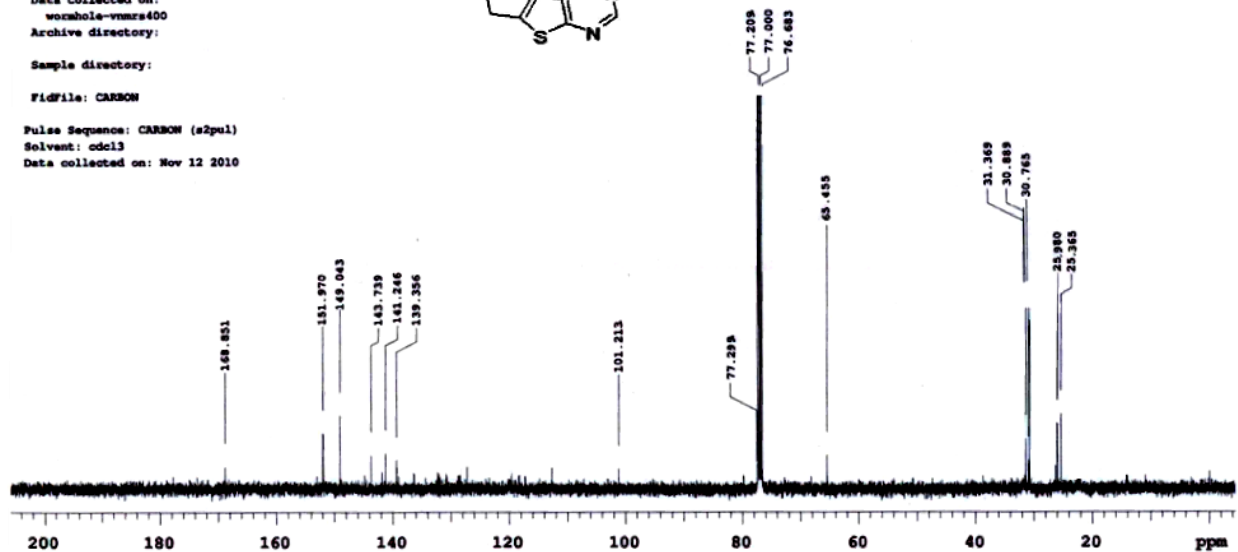

3g <sup>1</sup>H NMR (400 MHz, CDCl<sub>3</sub>)

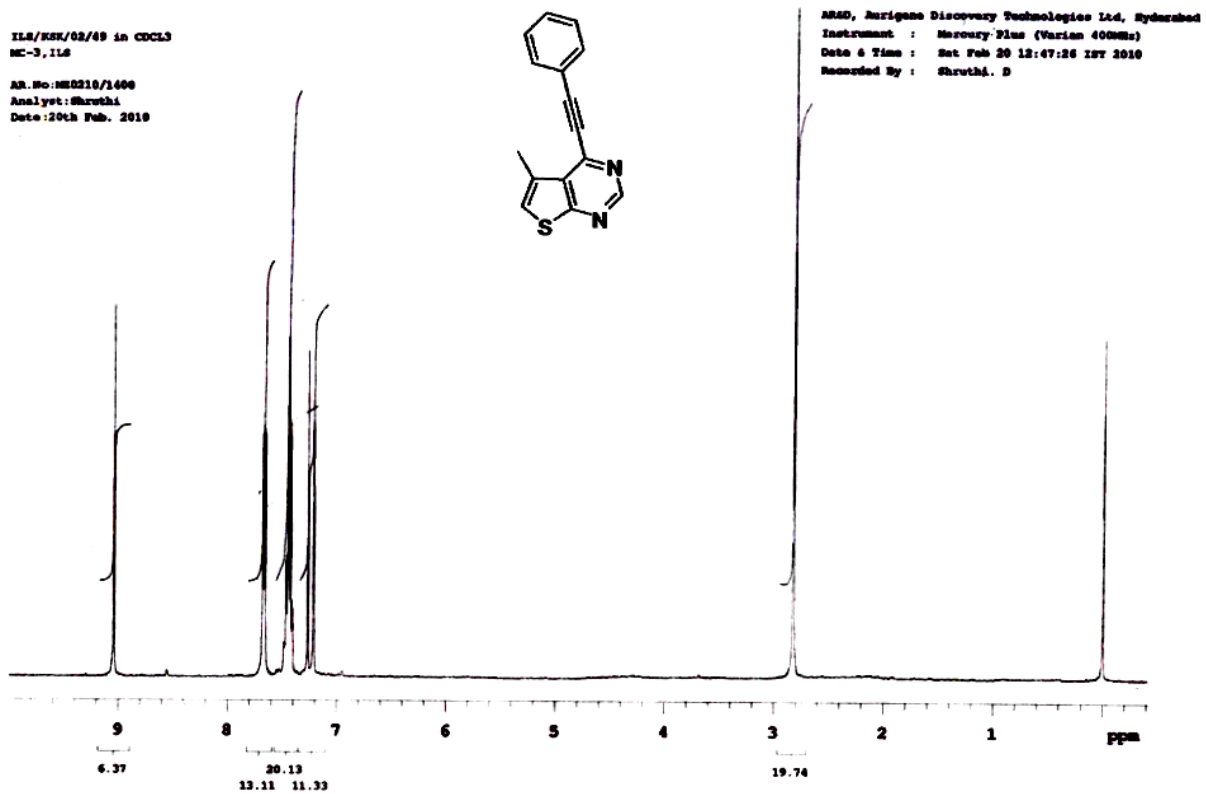

3g <sup>13</sup>C NMR (100 MHz, CDCl<sub>3</sub>)

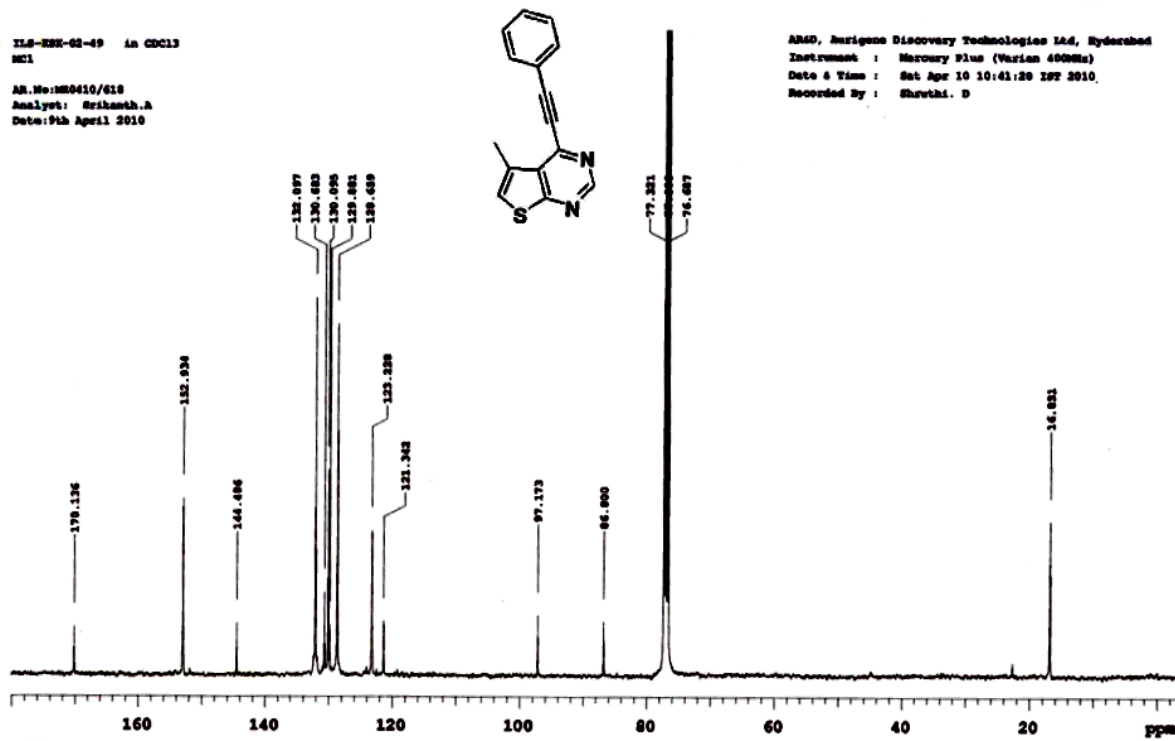

3h <sup>1</sup>H NMR (400 MHz, CDCl<sub>3</sub>)

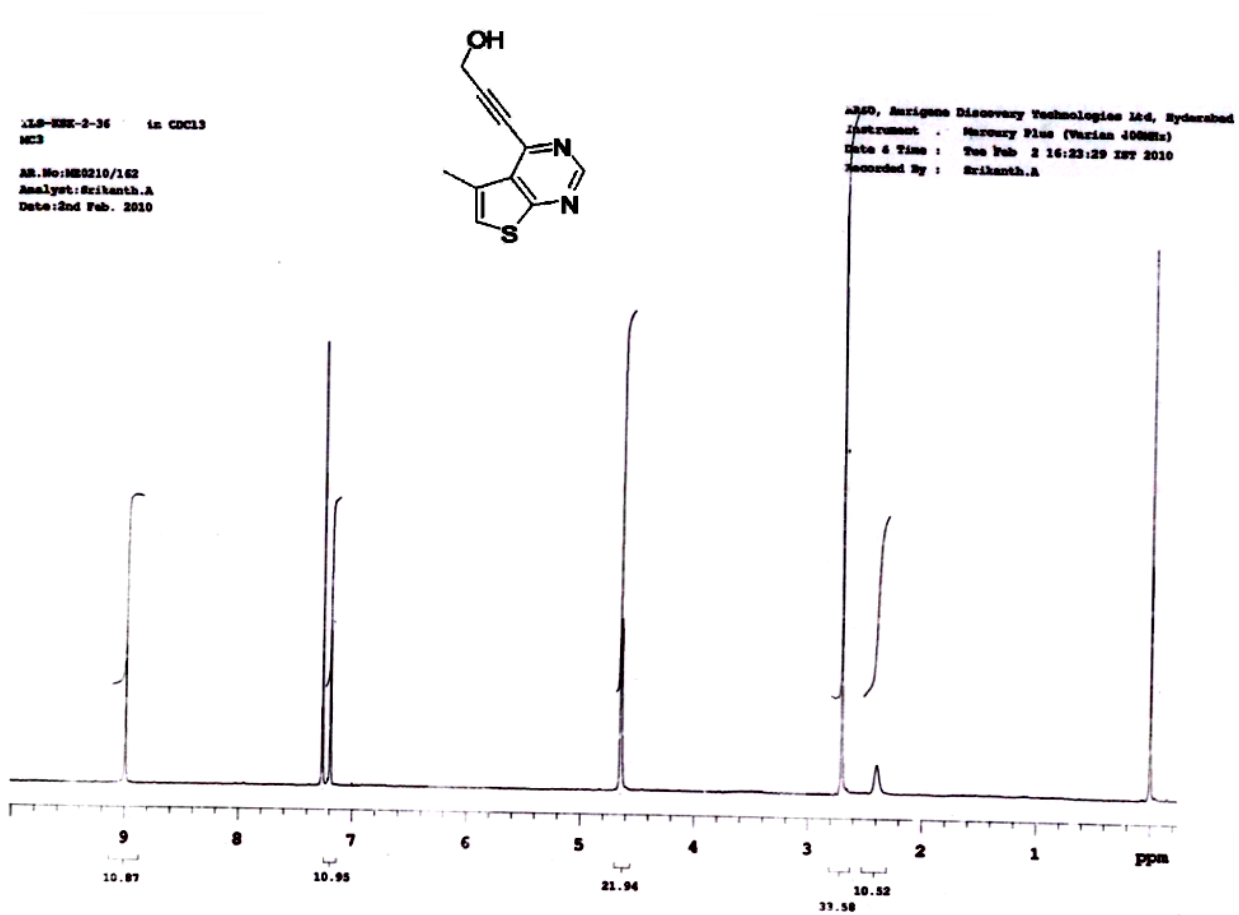



3h  $^{13}\text{C}$  NMR (100 MHz,  $\text{CDCl}_3$ )

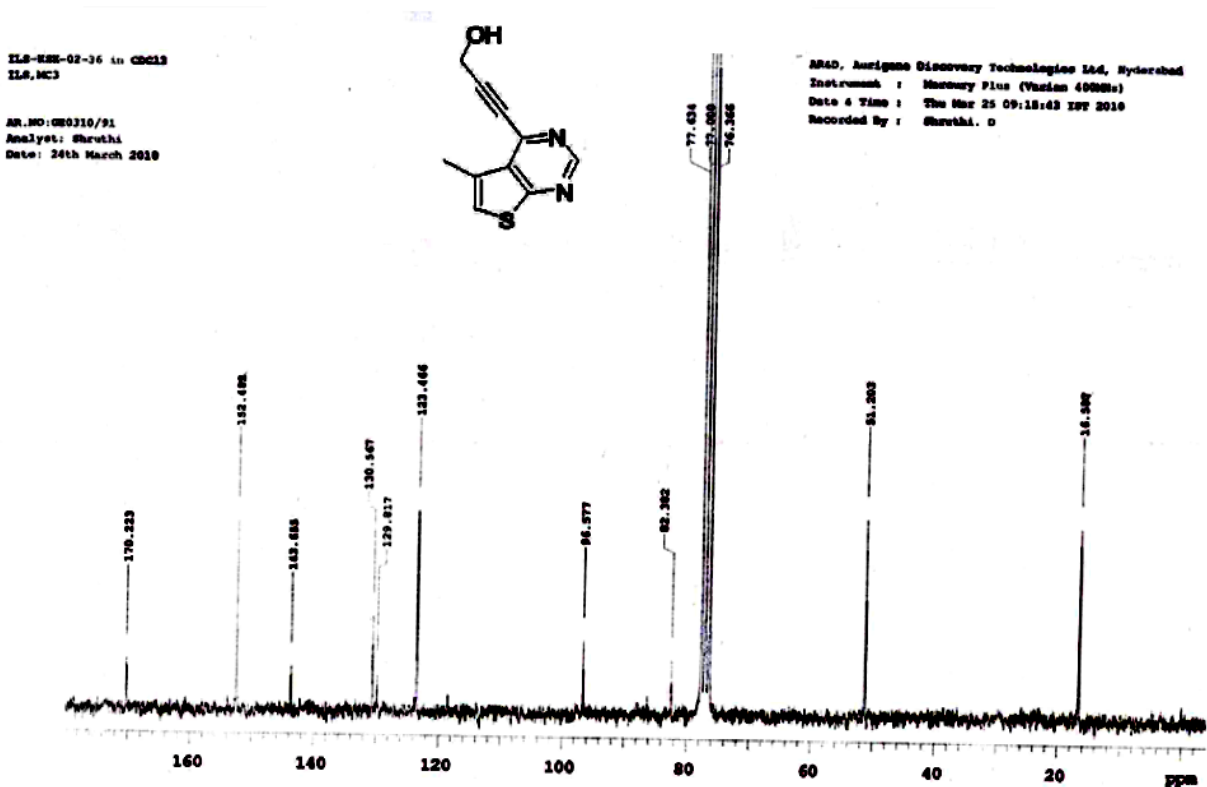

3i <sup>1</sup>H NMR (400 MHz, CDCl<sub>3</sub>)

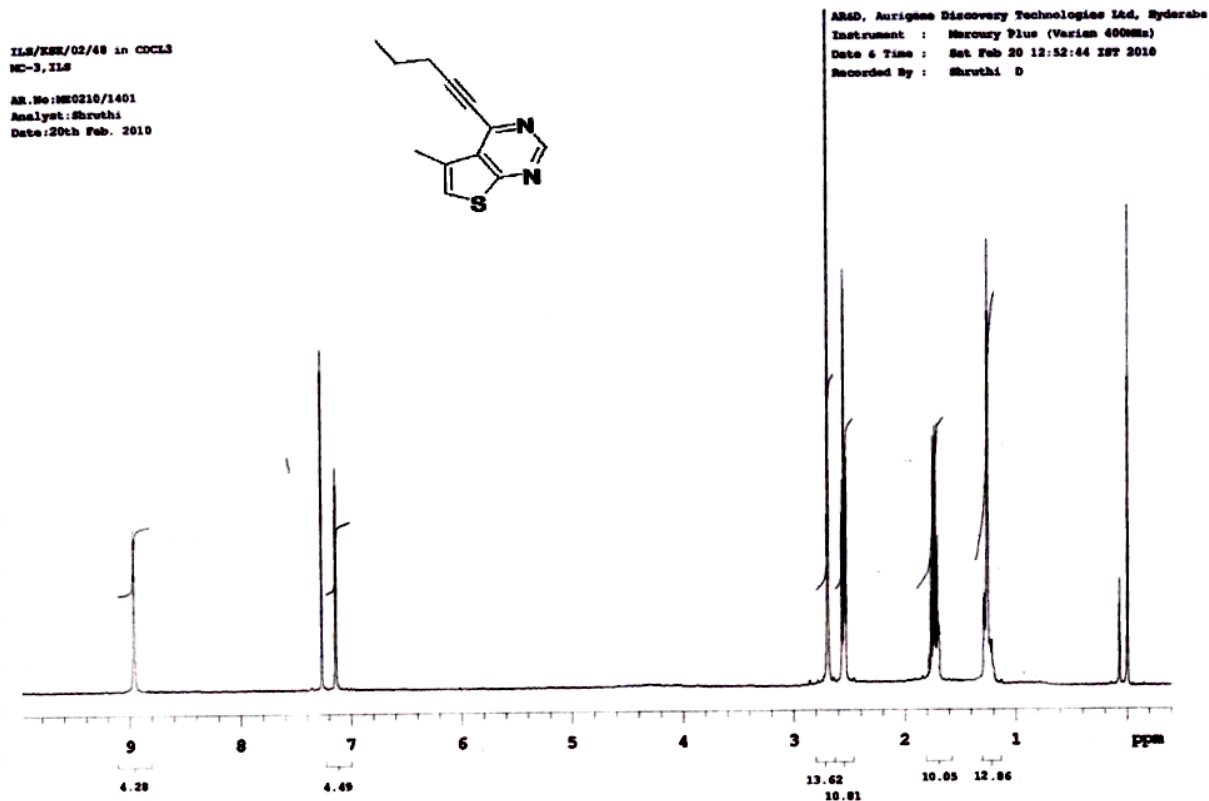

3i <sup>13</sup>C NMR (100 MHz, CDCl<sub>3</sub>)

ILS/RRR/02/48 in CDCl<sub>3</sub>  
MC-3, ILS

AR.No:MR0310/1560  
Analyst:Shruthi  
Date:24th March 2010

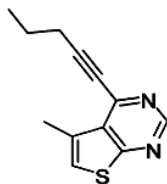

AR&D, Aurigene Discovery Technologies Ltd, Hyderabad  
Instrument : Mercury Plus (Varian 400MHz)  
Date & Time : Wed Mar 24 13:48:30 IST 2010  
Recorded By : Shruthi. D

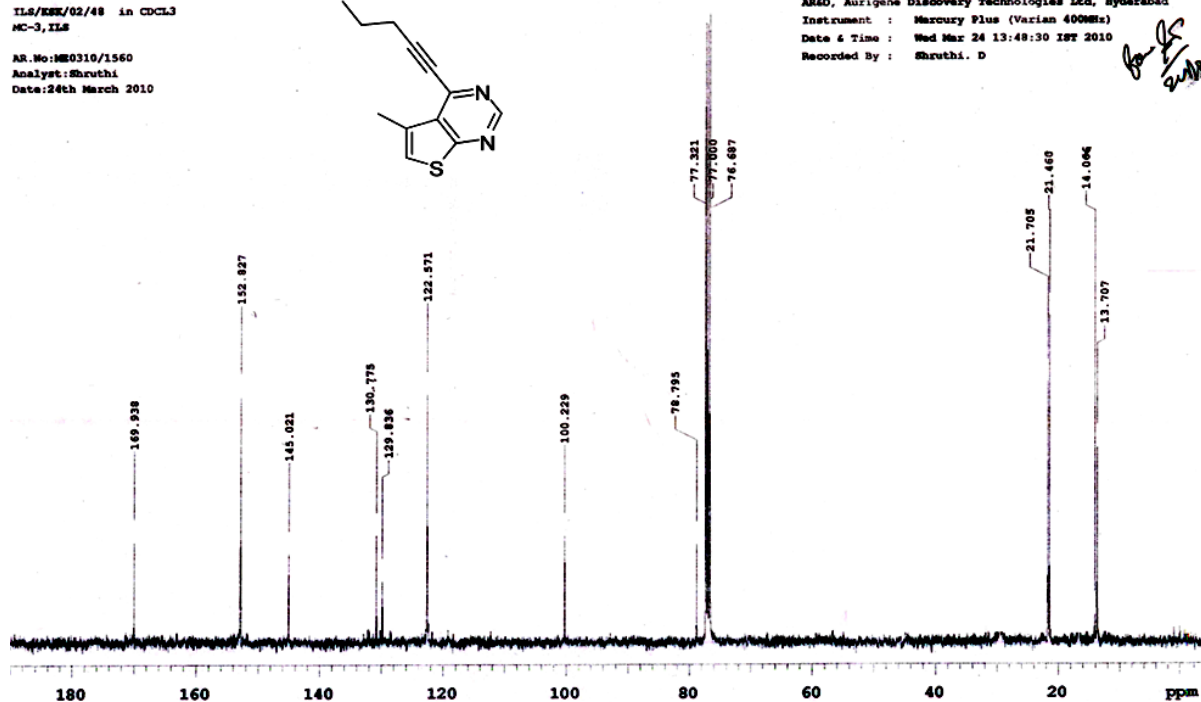

3j <sup>1</sup>H NMR (400 MHz, CDCl<sub>3</sub>)

ILS-KSK-02-130-2 in CDCl<sub>3</sub>  
File No: 20101124\_10

Sample Name:

Data Collected on:  
wormhole-vnmrs400

Archive directory:

Sample directory:

FidFile: PROTON

Pulse Sequence: PROTON (s2pul)  
Solvent: cdcl3  
Data collected on: Nov 24 2010

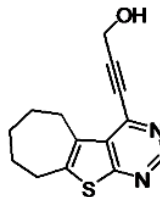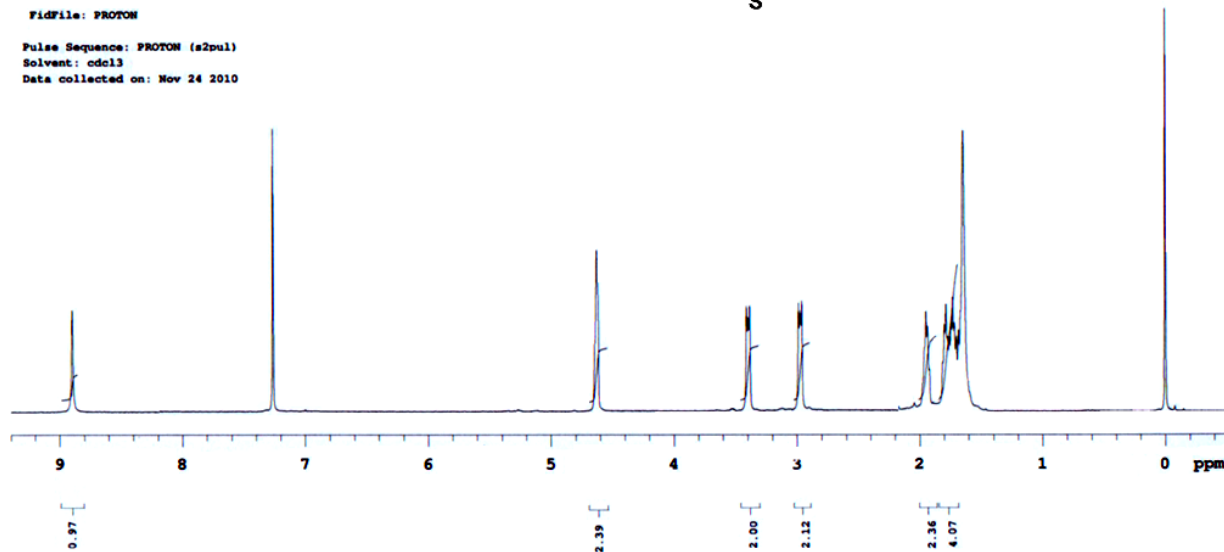

3j <sup>13</sup>C NMR (100 MHz, CDCl<sub>3</sub>)

ILS-KSR-02-130 in CDCl<sub>3</sub>  
13C Expt.  
File No: 20101112\_7  
Sample Name:  
Data Collected on:  
wormhole-vvms400  
Archive directory:  
Sample directory:  
Fidfile: CARBON  
Pulse Sequence: CARBON (s2pul)  
Solvent: cdcl3  
Data collected on: Nov 12 2010

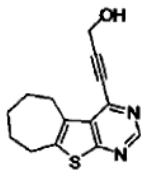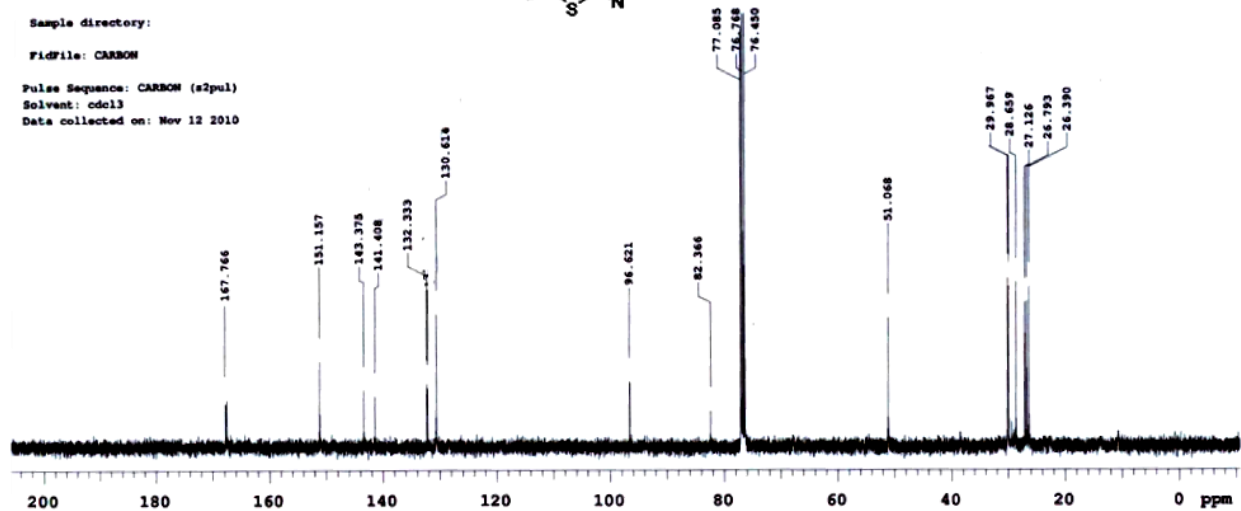

3k  $^1\text{H}$  NMR (400 MHz,  $\text{CDCl}_3$ )

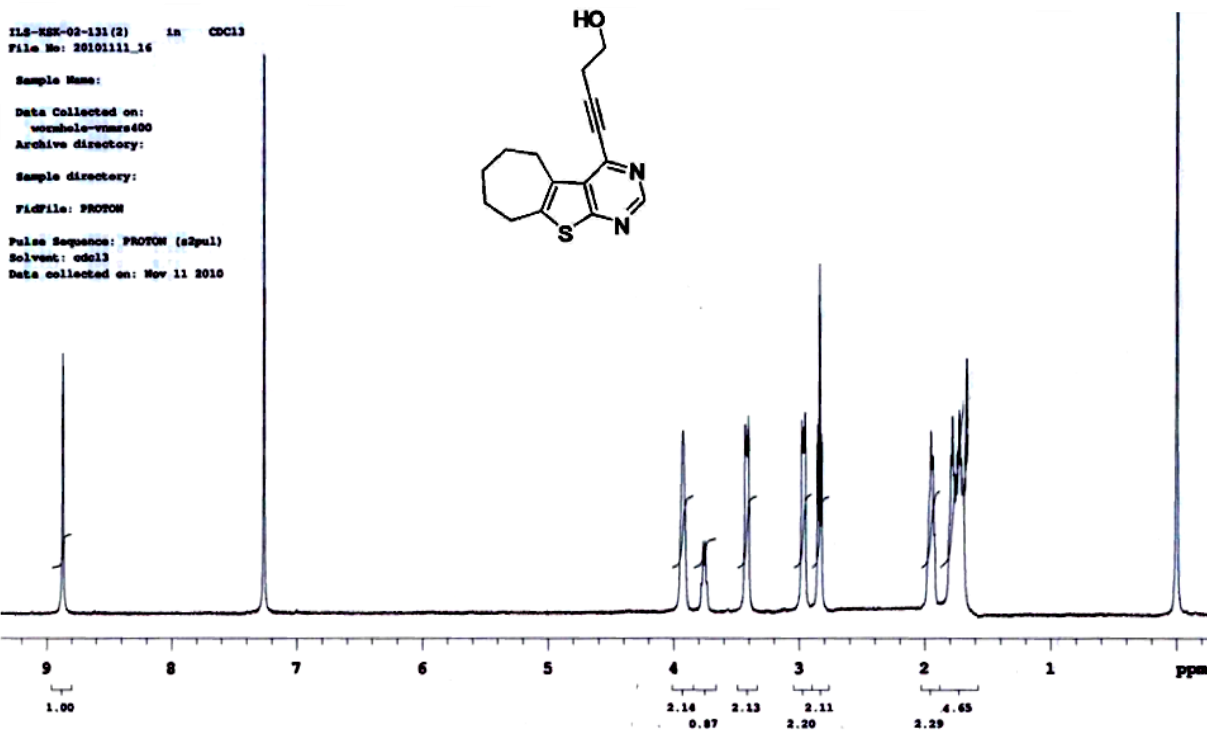

3k  $^{13}\text{C}$  NMR (100 MHz,  $\text{CDCl}_3$ )

ILS-KSK-02-131-2 in  $\text{CDCl}_3$   
13C Expt.  
File No:20101112\_3  
Sample Name:  
Data Collected on:  
wormhole-vnmr400  
Archive directory:  
Sample directory:  
Fidfile: CARBON  
Pulse Sequence: CARBON (s2pul)  
Solvent: cdcl3  
Data collected on: Nov 12 2010

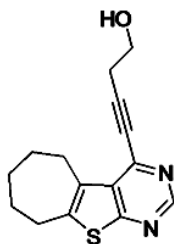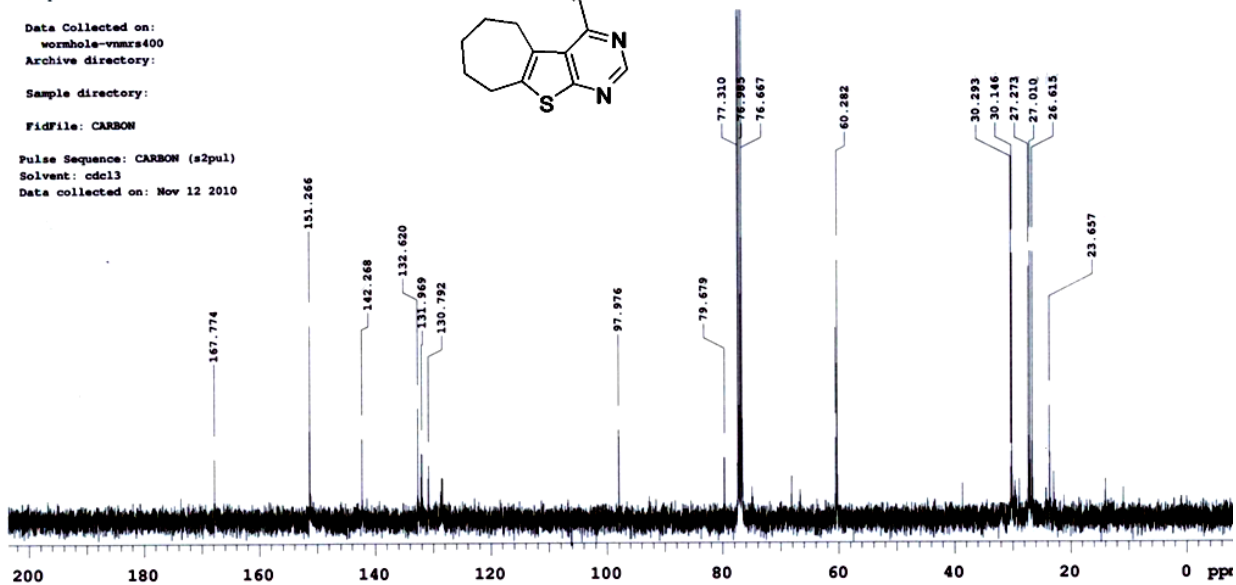

31  $^1\text{H}$  NMR (400 MHz,  $\text{CDCl}_3$ )

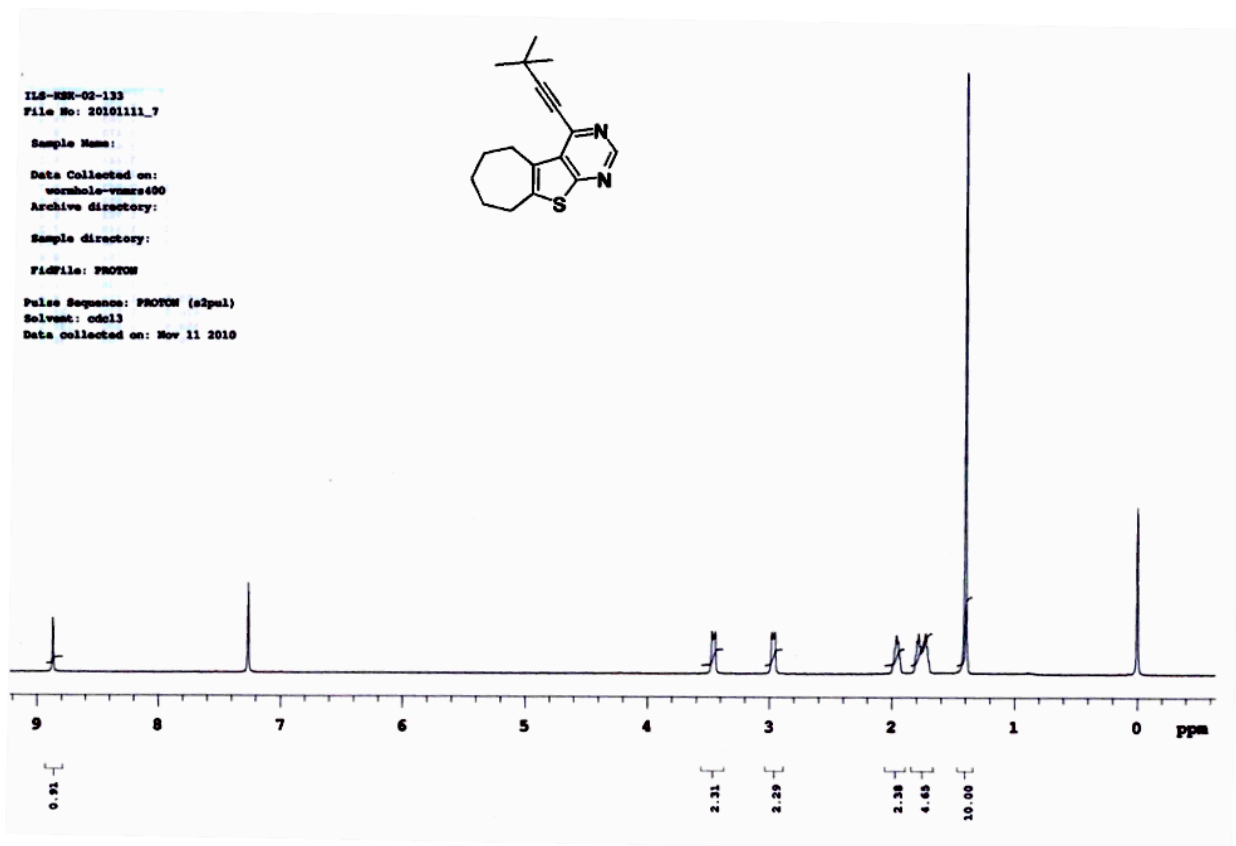



31 <sup>13</sup>C NMR (100 MHz, CDCl<sub>3</sub>)

ILS-KSK-02-133\_13C  
13C Expt.  
File No:20101111\_11  
Sample Name:  
Data Collected on:  
wormhole-vmsr400  
Archive directory:  
Sample directory:  
FidFile: CARBON  
Pulse Sequence: CARBON (s2pul)  
Solvent: cdcl3  
Data collected on: Nov 11 2010

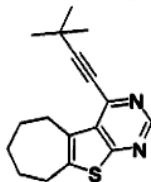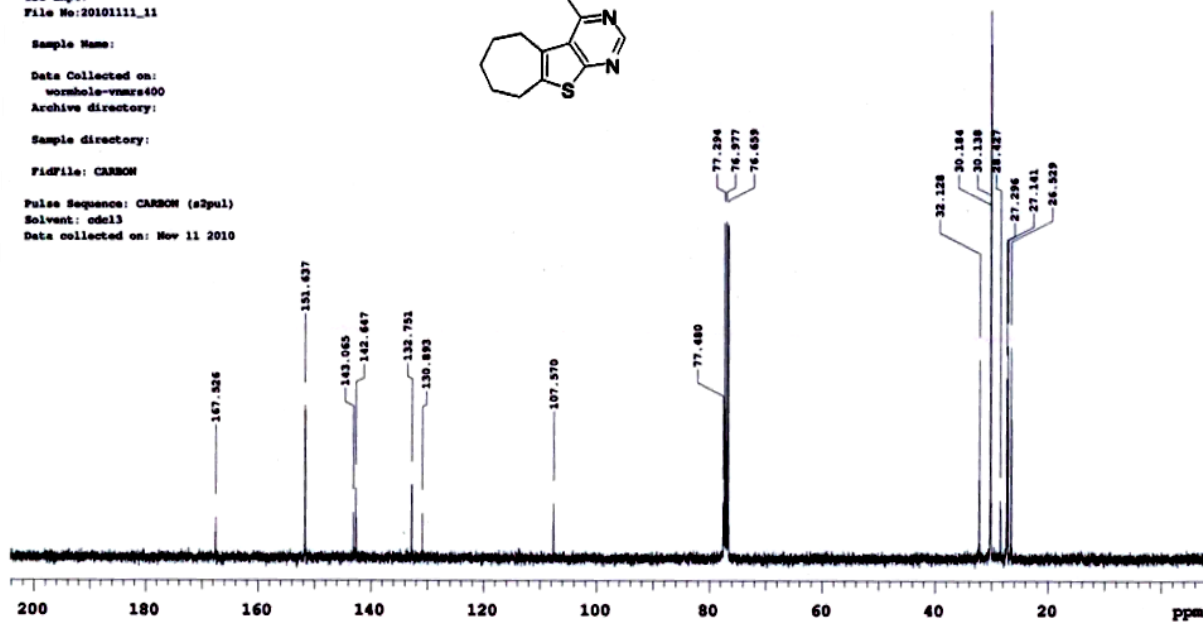

3m  $^1\text{H}$  NMR (400 MHz,  $\text{CDCl}_3$ )

118-NM-08-128-2  
File No: 20101111\_10

Sample Name:

Data Collected on:

Acquire directory:

Archive directory:

Sample directory:

Fidfile: PROTON

Pulse Sequence: PROTON (zgpg3)

Solvent: cdcl3

Data collected on: Nov 11 2010

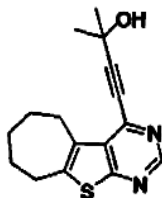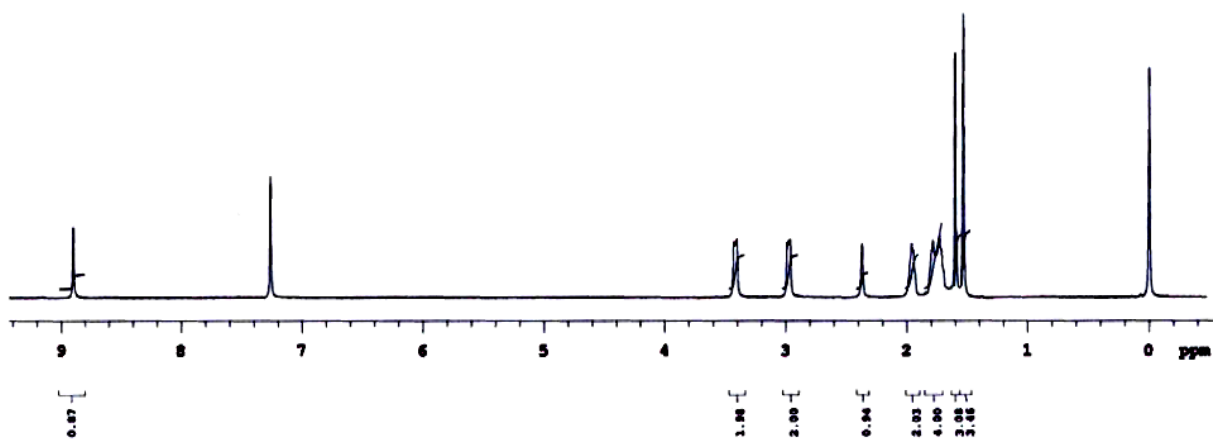

**3m**  $^{13}\text{C}$  NMR (100 MHz,  $\text{CDCl}_3$ )

ILS-RSK-02-132(2) in  $\text{CDCl}_3$   
13C Expt.  
File No: 20101111\_17  
Sample Name:  
Data Collected on:  
wormhole-vnmr600  
Archive directory:  
Sample directory:  
FidFile: CARBON  
Pulse Sequence: CARBON (s2pul)  
Solvent: cdcl3  
Data collected on: Nov 11 2010

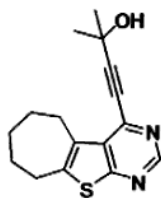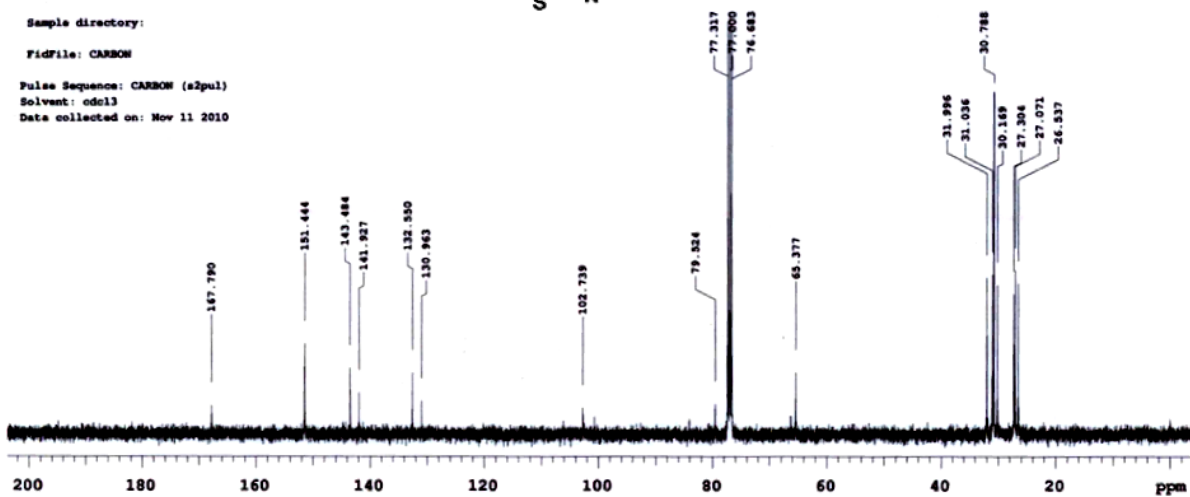

3n <sup>1</sup>H NMR (400 MHz, CDCl<sub>3</sub>)

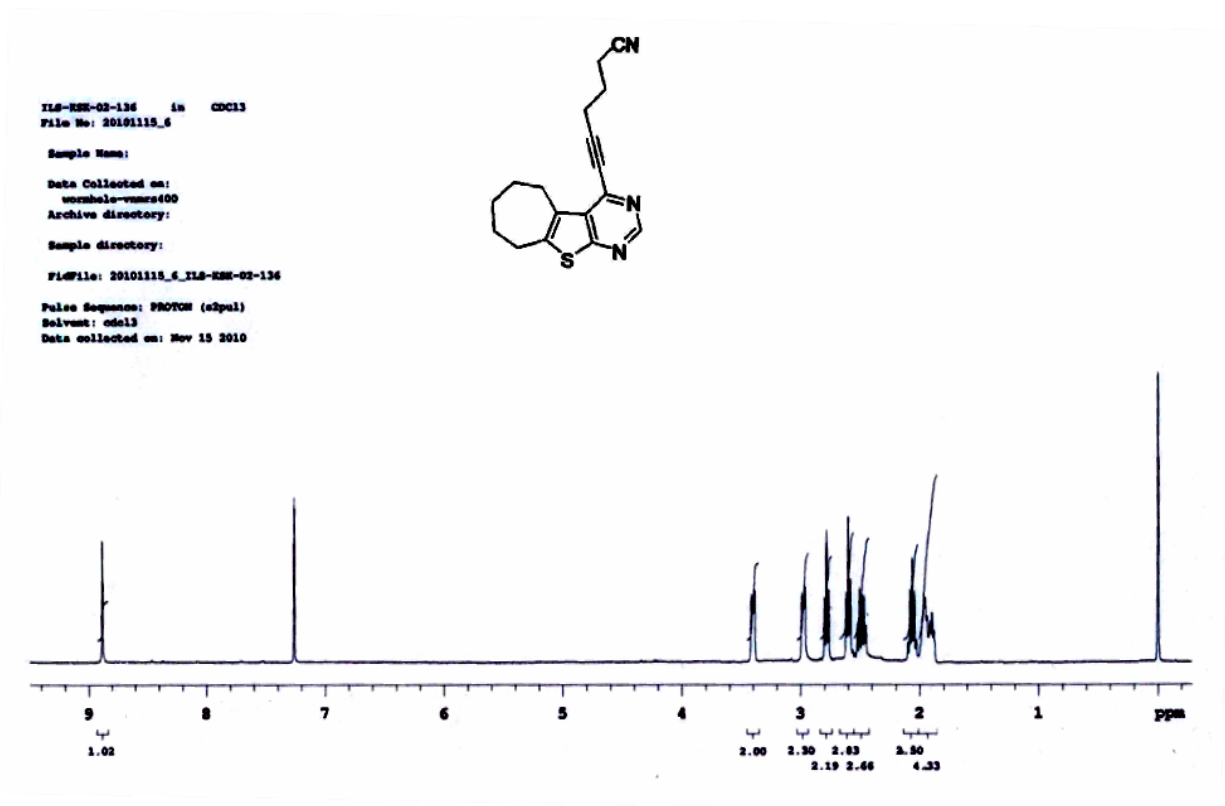

3n <sup>13</sup>C NMR (100 MHz, CDCl<sub>3</sub>)

ILS-RSR-02-136 in CDCl<sub>3</sub>  
13C Expt.  
File No: 20101115\_10  
Sample Name:  
Data Collected on:  
wormhole-vmars400  
Archive directory:  
Sample directory:  
FidFile: CARBON  
Pulse Sequence: CARBON (s2pul)  
Solvent: cdcl3  
Data collected on: Nov 15 2010

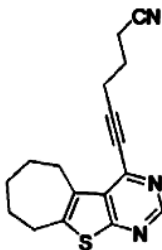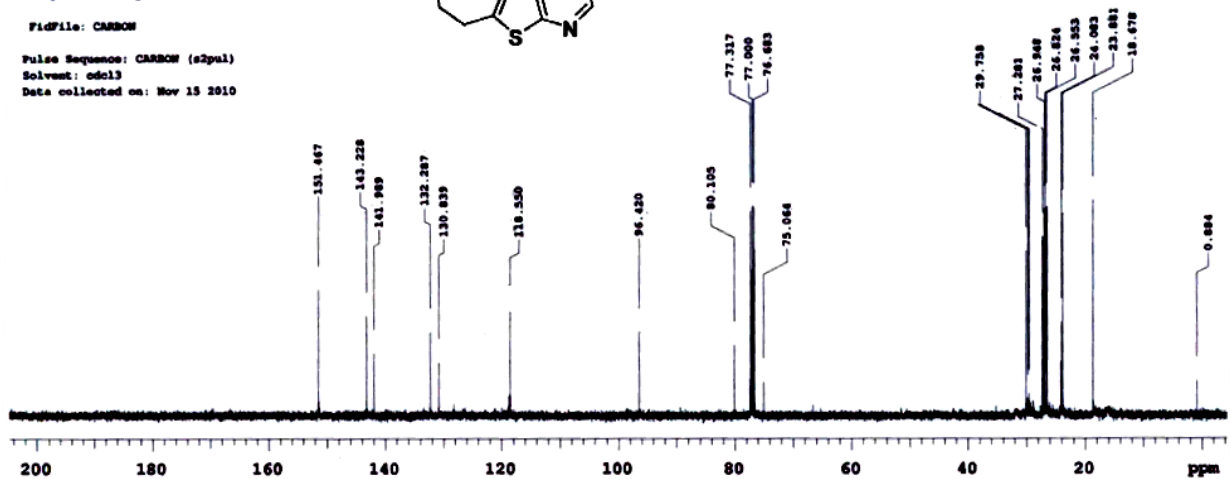

Supplement: Additional file 2 [file 1860-5397-7-44-S2.pdf]
